# Supplementary material
Source: PubMed Central journal article supplement (PMC8930617)
Supplement: NIHMS1777159-supplement-supinfo.pdf [file NIHMS1777159-supplement-supinfo.pdf]

# Supporting Information

## Table of Contents

|                                                          |         |
|----------------------------------------------------------|---------|
| 1. Supplementary figures ( <b>Figure S1 – S15</b> )..... | S2-S16  |
| 2. NMR spectra of synthetic compounds .....              | S17-S20 |

SPECTRUM - MS, Her-Rha4.raw, FTMS + p ESI sid=15.00 Full ms [1500.0000-5000.0000], Scan #: 75-137, RT: 2.75-5.02, AV: 63,  
NL: 9.44e+005 SIN: 1655

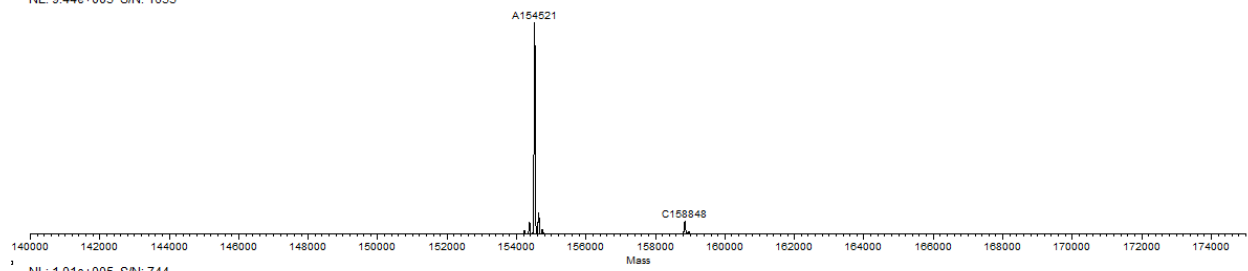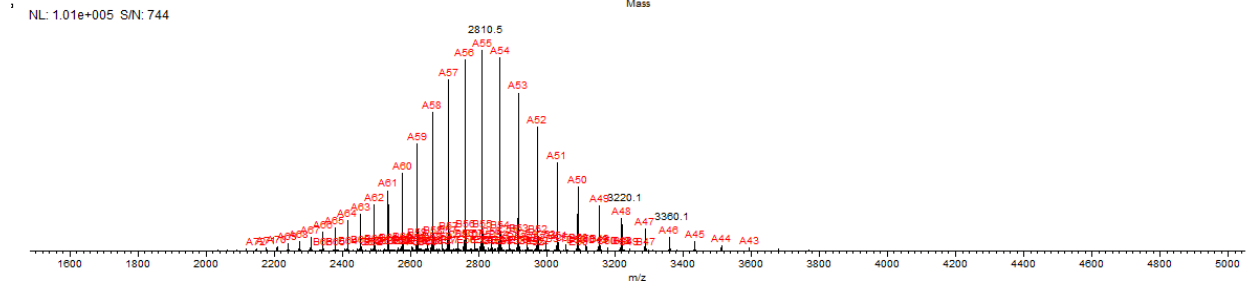

**Figure S1.** LC-ESI-MS analysis of the intact rhamnose functionalized antibody (**21**)

SPECTRUM - MS, Her-Rha4+IdeS.raw, FTMS + p ESI sid=15.00 Full ms [400.0000-3000.0000], Scan #: 65-92, RT: 2.52-3.02, AV: 28,  
NL: 1.06e+006 S/N: 593

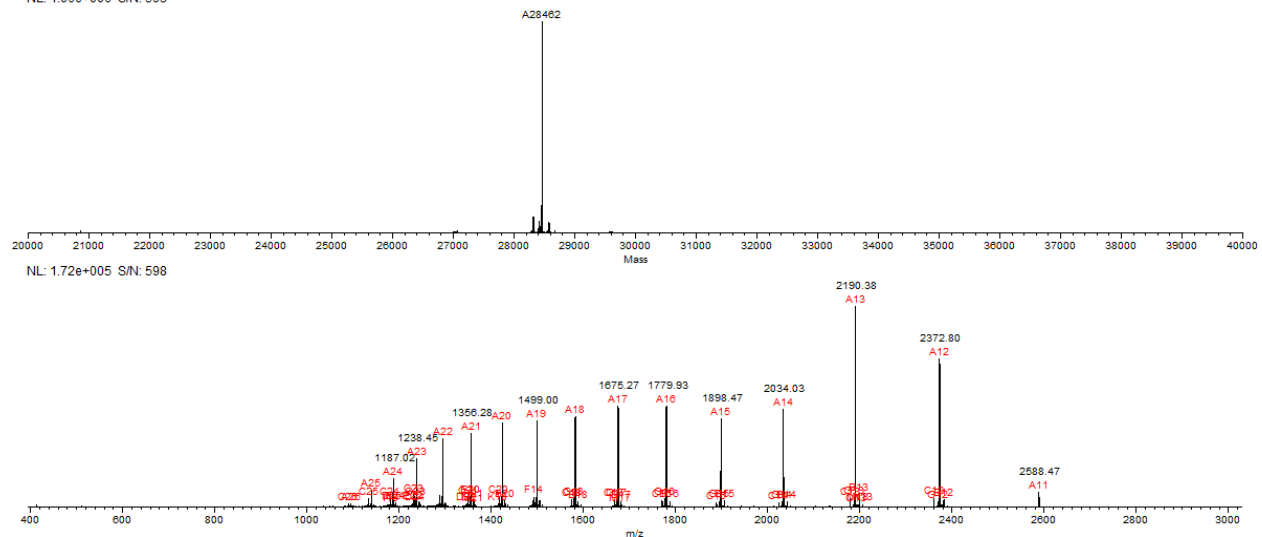

**Figure S2.** LC-ESI-MS analysis of the Fc domains released by IdeS treatment of the rhamnose functionalized antibody (**21**)

SPECTRUM - MS, Di-N3-SCT-Her+Rha4-DBCO-16h2.raw, FTMS + p ESI sid=40.00 Full ms [1500.0000-5000.0000], Scan #: 110-131, NL: 2.36e+006 S/N: 84

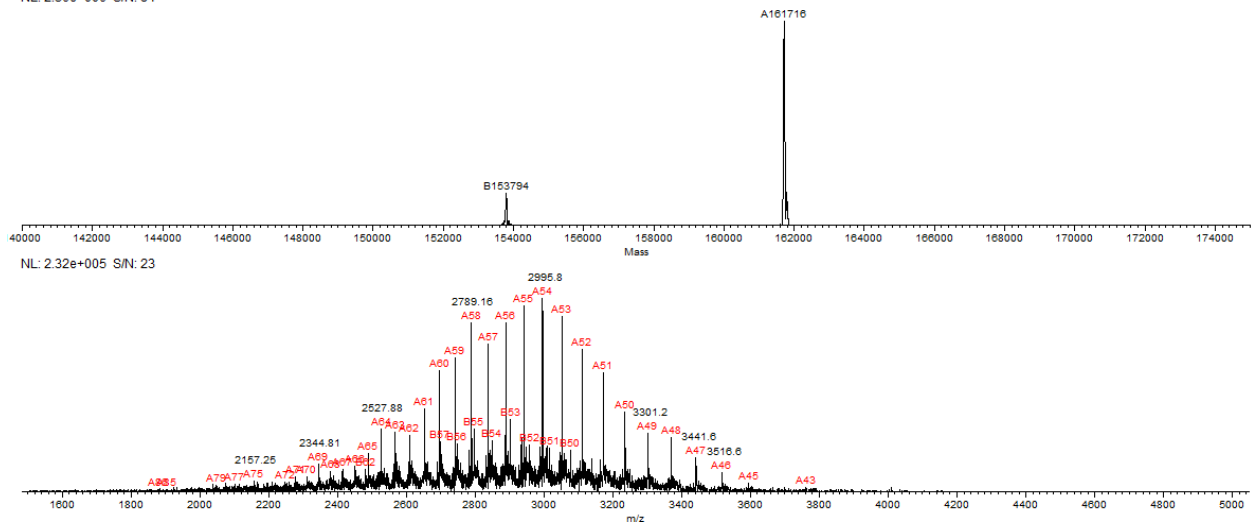

**Figure S3.** LC-ESI-MS analysis of the intact rhamnose cluster functionalized antibody (**22**)

SPECTRUM - MS, Rha16-Her+Ide-S.raw, FTMS + p ESI sid=40.00 Full ms [400.0000-3000.0000], Scan #: 60-106, RT: 2.28-2.87,  
NL: 5.44e+006 S/N: 943

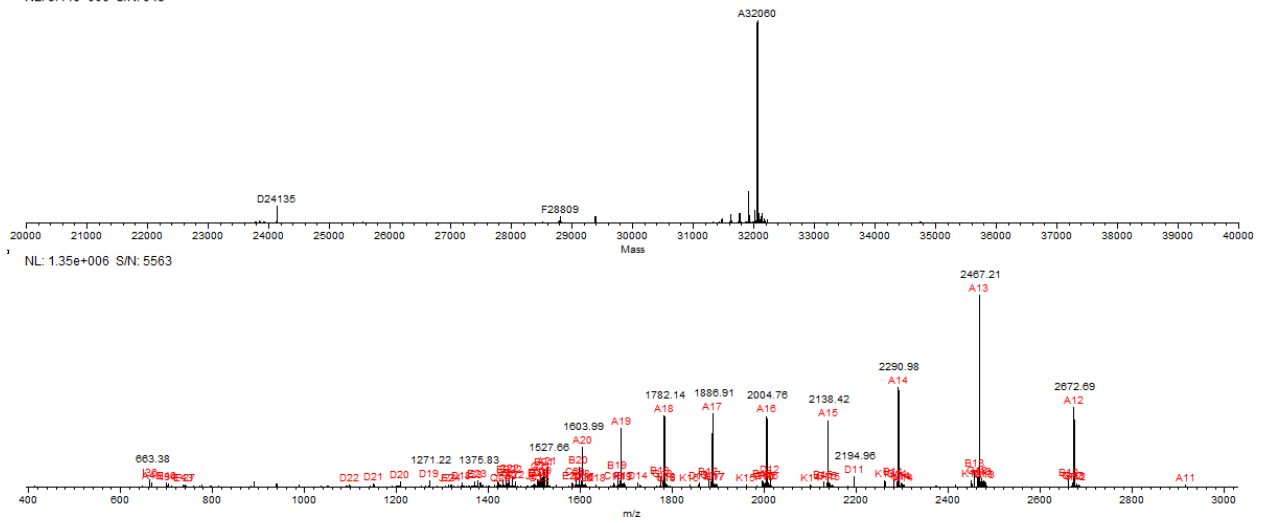

**Figure S4.** LC-ESI-MS analysis of the Fc domains released by IdeS treatment of the rhamnose cluster functionalized antibody (**22**)

SPECTRUM - MS, Her-a-Gal4.raw, FTMS + p ESI sid=15.00 Full ms [1500.0000-5000.0000], Scan #: 79-123, RT: 2.90-4.51, AV: 45,  
NL: 8.45e+005 S/N: 1291

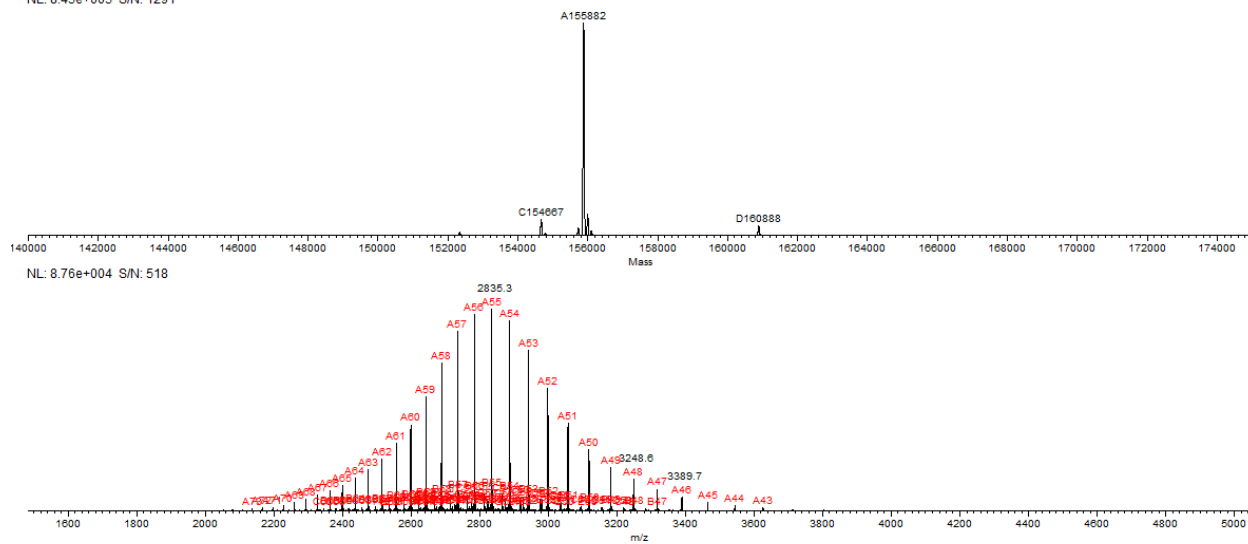

**Figure S5.** LC-ESI-MS analysis of the intact  $\alpha$ -Gal functionalized antibody (**23**)

SPECTRUM - MS, Her-a-Gal4+IdeS.raw, FTMS + p ESI sid=15.00 Full ms [400.0000-3000.0000], Scan #: 60-89, RT: 2.33-2.87, NL: 1.15e+006 S/N: 801

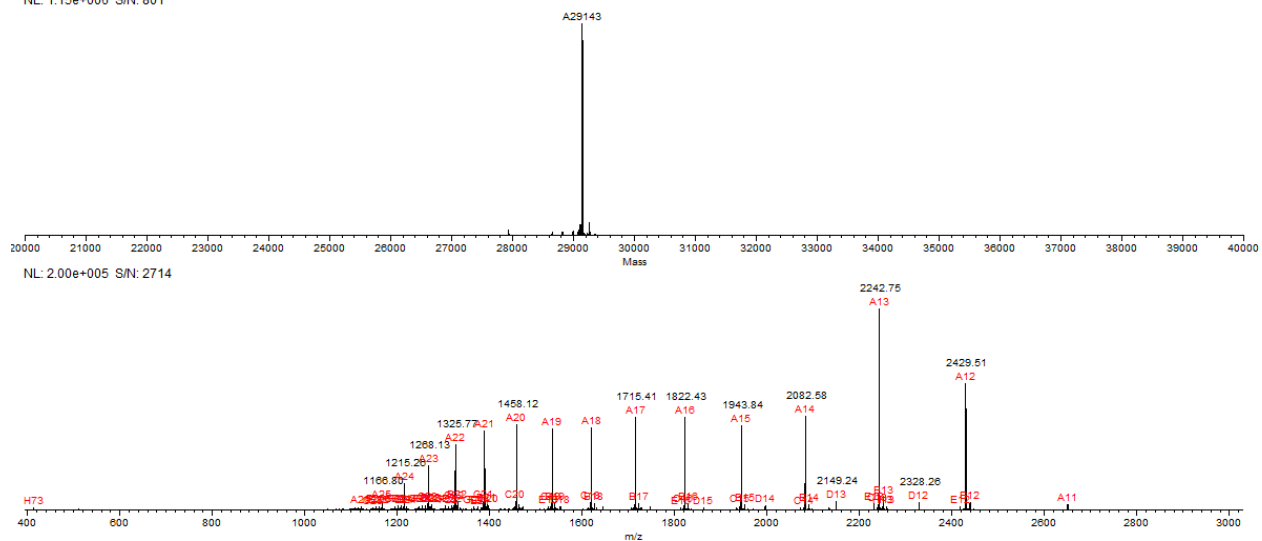

**Figure S6.** LC-ESI-MS analysis of the Fc domains released by IdeS treatment of the  $\alpha$ -Gal functionalized antibody (**23**)

SPECTRUM - MS, DI-N3-SCT-Her+a-Gal4-Lys3-DBCO-44h.raw, FTMS + p ESI sid=40.00 Full ms [1500.0000-5000.0000], Scan #: 81-123,  
NL: 6.24e+005 S/N: 594

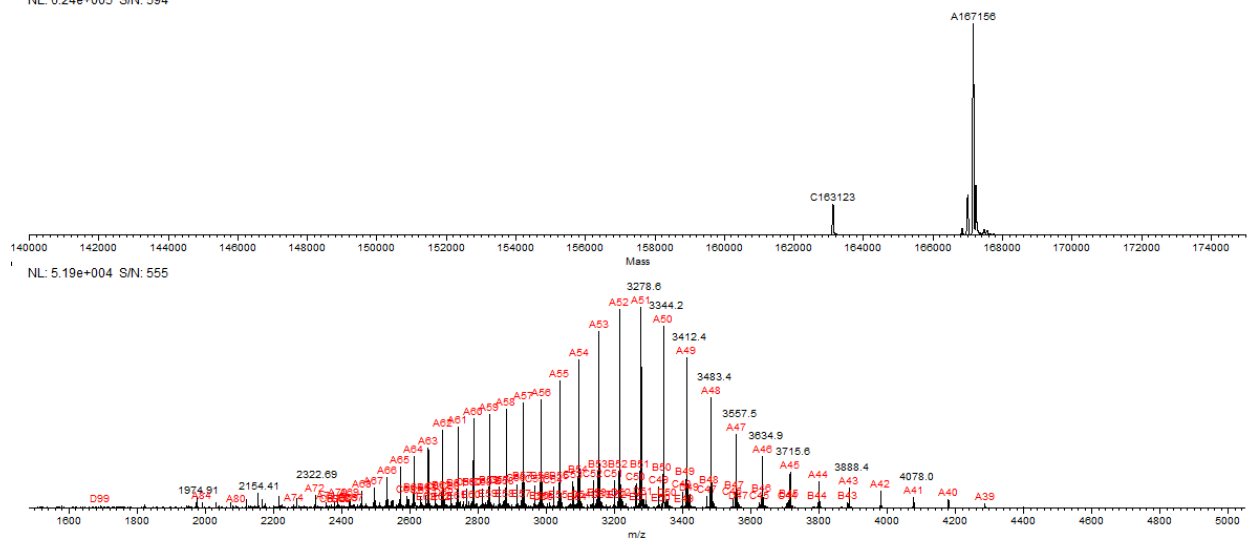

**Figure S7.** LC-ESI-MS analysis of the intact  $\alpha$ -Gal cluster functionalized antibody (**24**)



SPECTRUM - MS, oc-a-Gal16-Her+Ide-S.raw, FTMS + p ESI sid=40.00 Full ms [400.0000-3000.0000], Scan #: 57-93, RT: 2.19-2.66,  
NL: 5.04e+006 SIN: 507

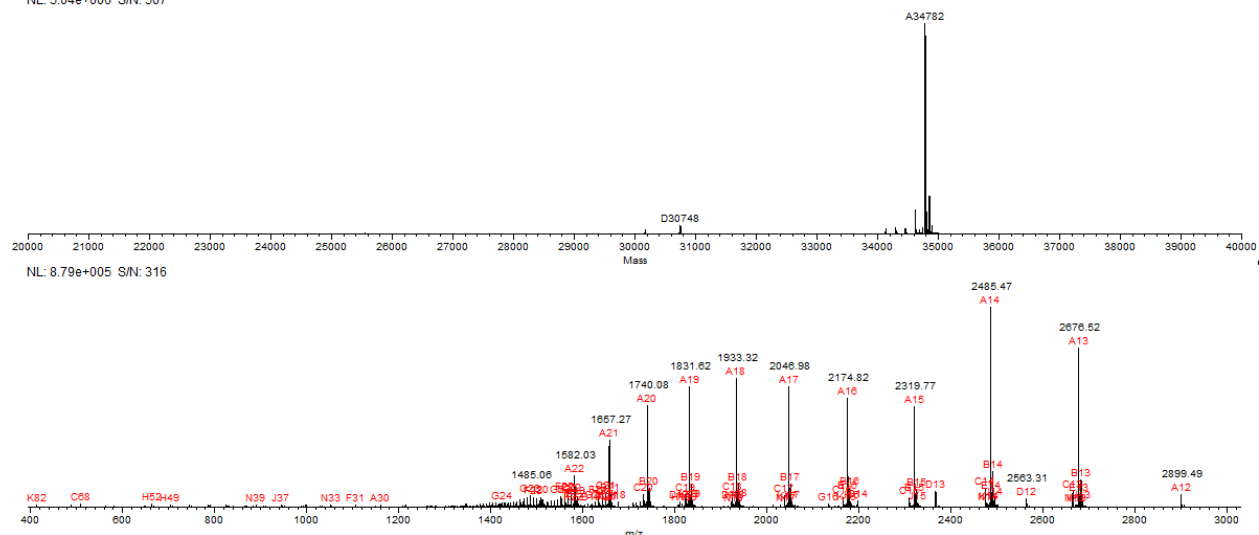

**Figure S8.** LC-ESI-MS analysis of the Fc domains released by IdeS treatment of the  $\alpha$ -Gal functionalized antibody (**24**)

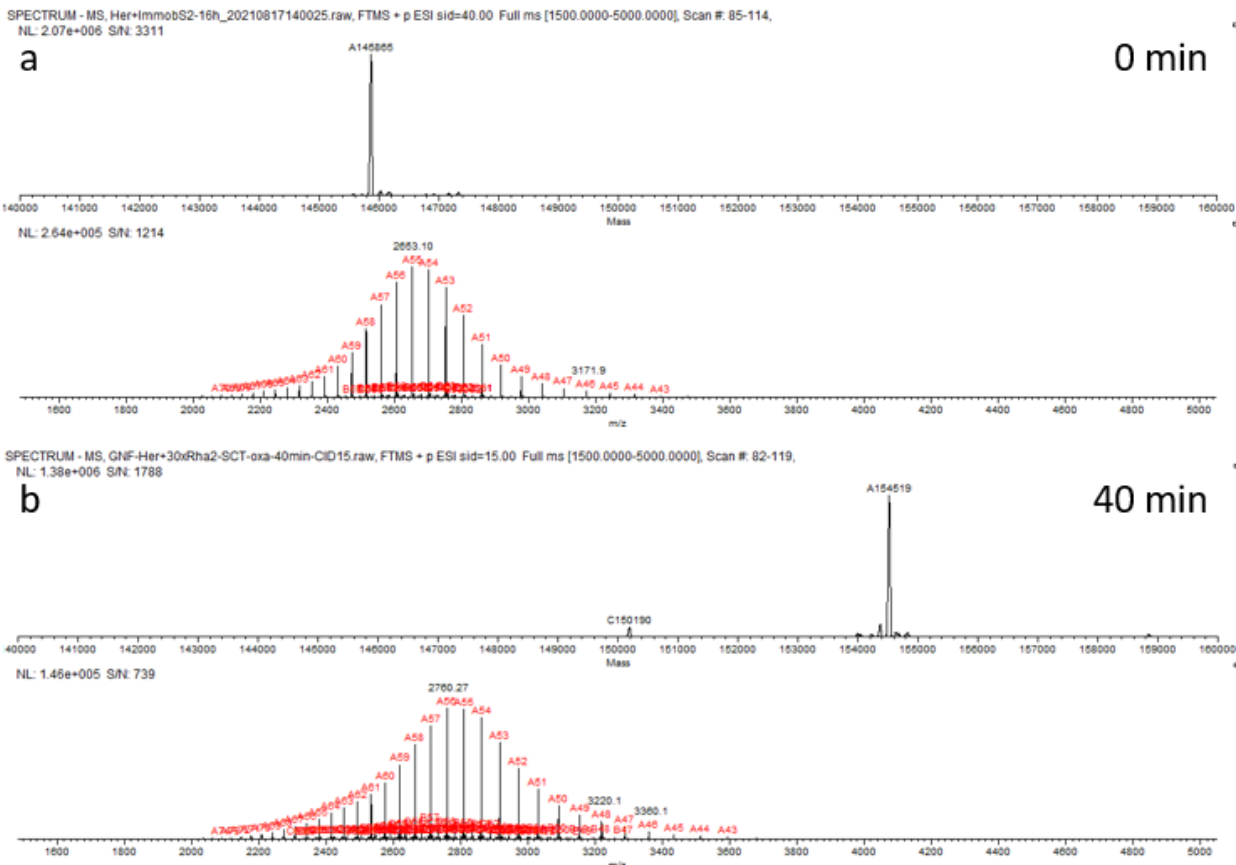

**Figure S9.** The LC-ESI-MS monitoring of the glycosylation reactions between azide-glycan oxazoline **27a** and antibody **28** catalyzed by Endo-S2 D184M. A mixture of the deglycosylated antibody **28** (0.5 mg, 3.3 nmol, 25 mg/mL), glycan oxazoline **27a** (0.44 mg, 100 nmol, 30 *mol. equiv.* of the antibody), and the mutant enzyme (0.1 mg/mL) in a Tris buffer (100 mM, pH 7.2) was incubated at 30 °C and the reaction was monitored by LC-ESI-MS analysis of the intact antibodies at 20 min intervals. a) the deconvoluted mass of **28**; b) the deconvoluted mass of the reaction mixture catalyzed by Endo-S2 D184M at 40 min.

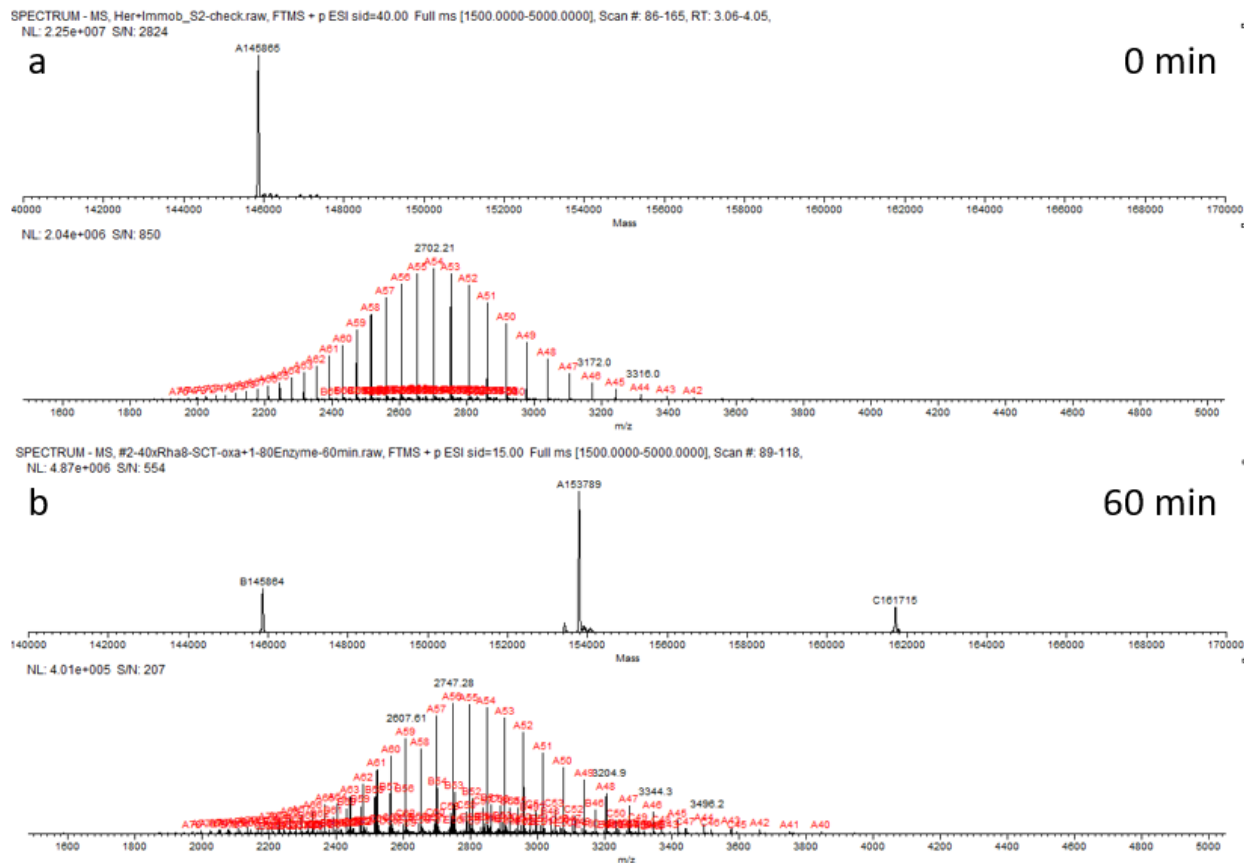

**Figure S10.** The LC-ESI-MS monitoring of the glycosylation reactions between azide-glycan oxazoline **27b** and antibody **28** catalyzed by Endo-S2 D184M. A mixture of the deglycosylated antibody **28** (0.1 mg, 3.3 nmol, 25 mg/mL), glycan oxazoline **27b** (0.44 mg, 100 nmol, 40 *mol. equiv.* of the antibody), and the mutant enzyme (0.4 mg/mL) in a Tris buffer (100 mM, pH 7.2) was incubated at 30 °C and the reaction was monitored by LC-ESI-MS analysis of the intact antibodies at 20 min intervals. a) the deconvoluted mass of **28**; b) the deconvoluted mass of the reaction mixture catalyzed by Endo-S2 D184M at 60 min.

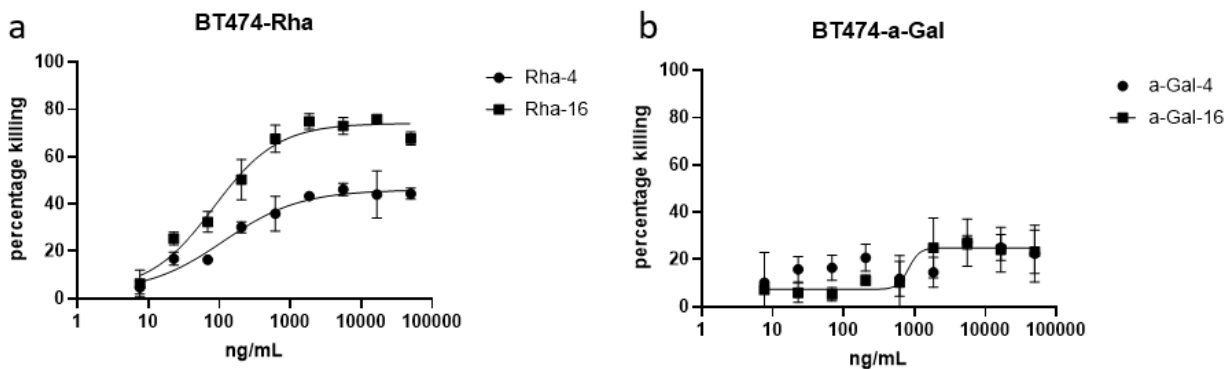

**Figure S11.** Cell killing assays for breast cancer cell lines a) Rhamnose conjugates with BT-474 (HER2 overexpression); b)  $\alpha$ -Gal conjugates with BT-474 (HER2 overexpression). The human serum was purchased from Cosmo Bio USA. All assays were performed in triplicate.

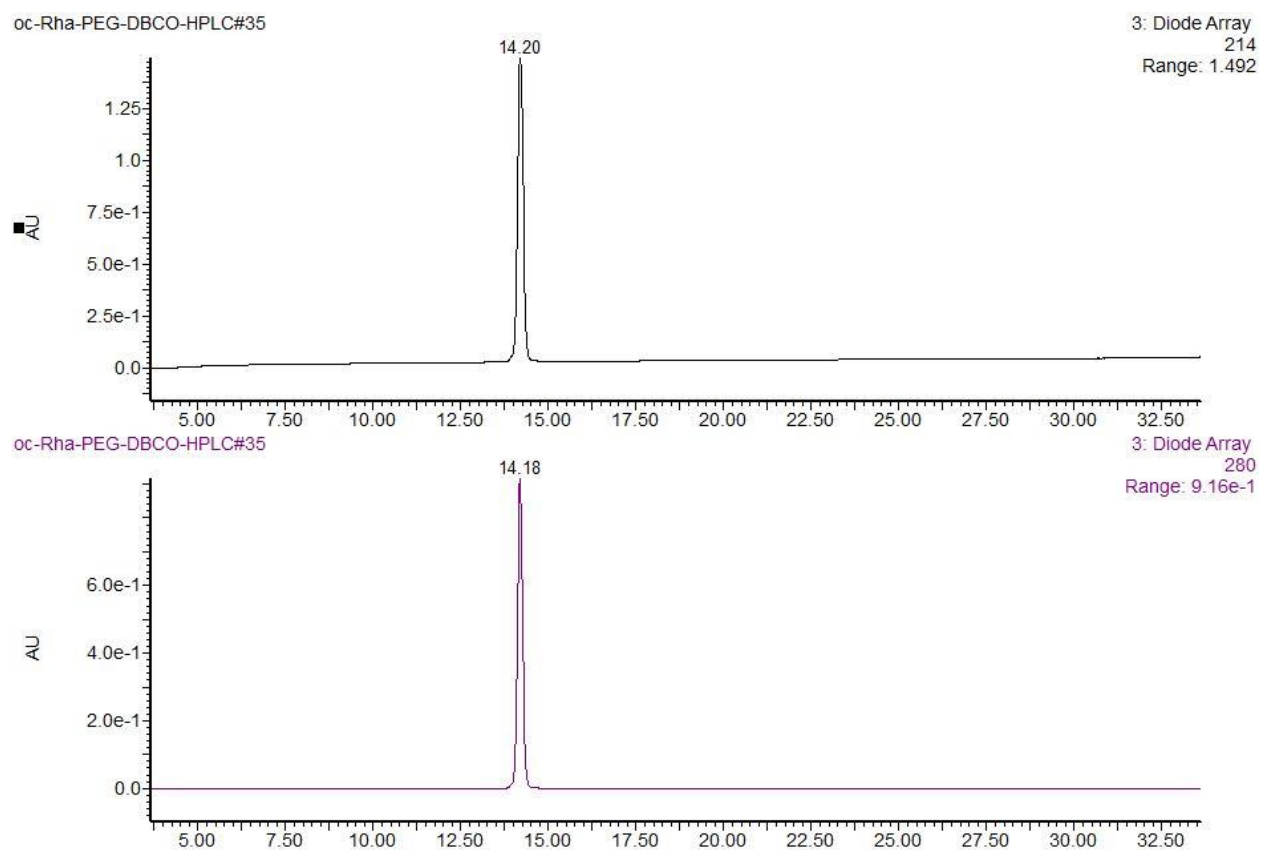

**Figure S12.** HPLC profile for **3**, 0.4 mL/min, 25-60%B, 30 min

oc-20201210-Rha4-Lys3-DBCO-hplc-LONG

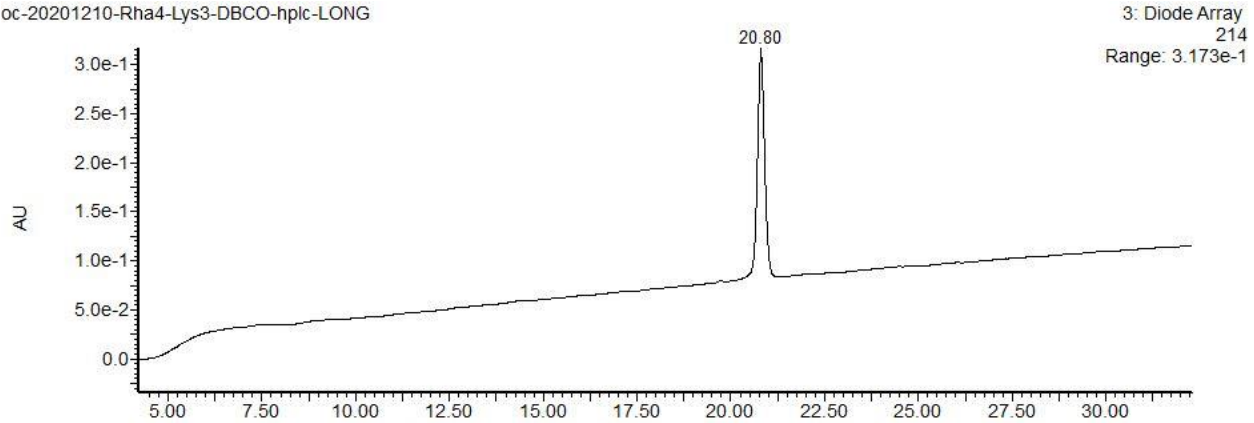

oc-20201210-Rha4-Lys3-DBCO-hplc-LONG

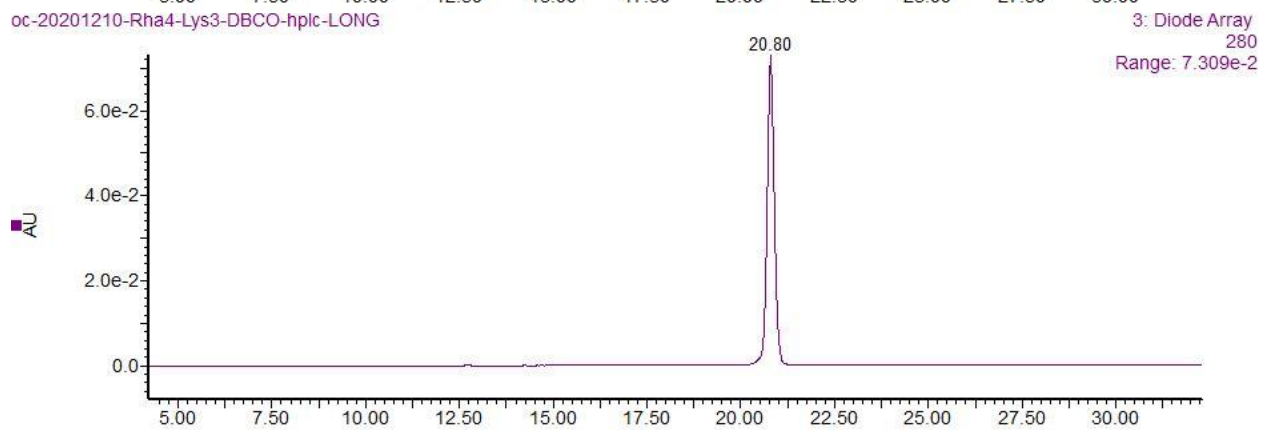

**Figure S13.** HPLC profile for **13**, 0.4 mL/min, 10-50%B, 30 min

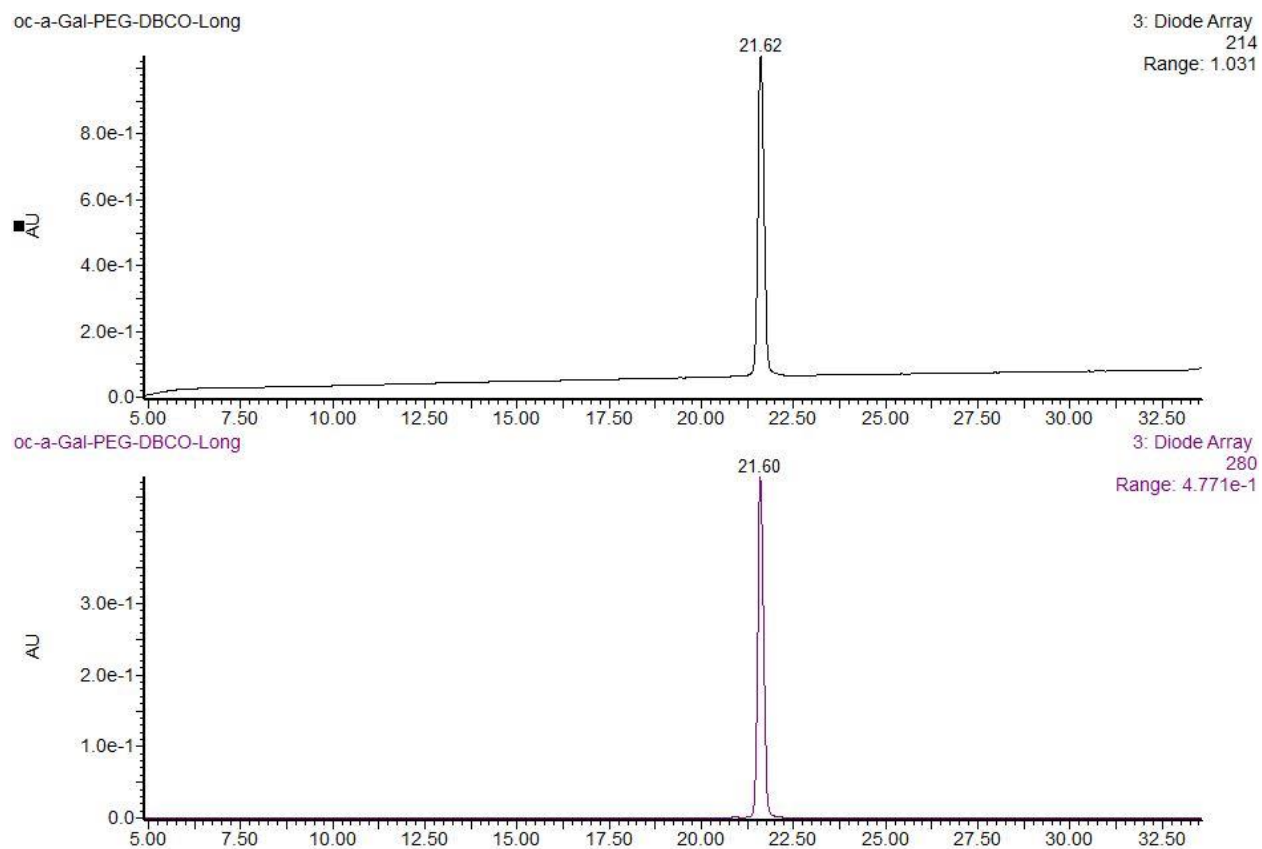

**Figure S14.** HPLC profile for **15**, 0.4 mL/min, 10-50%B, 30 min

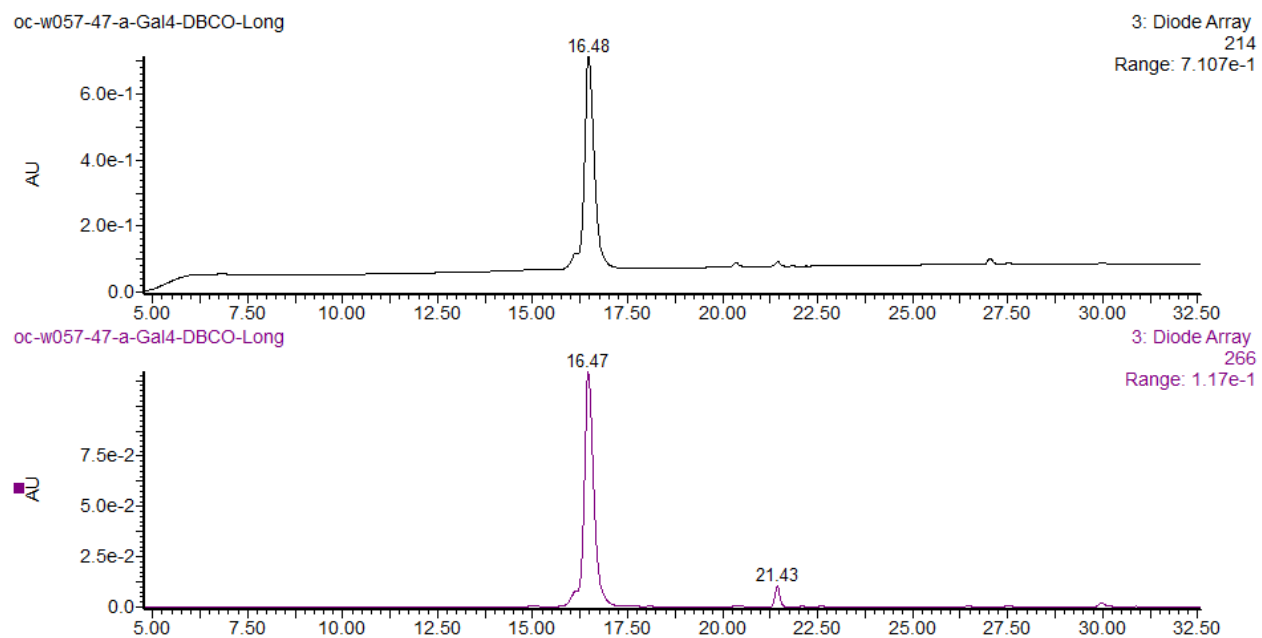

**Figure S15.** HPLC profile for **18**, 0.4 mL/min, 10-50%B, 30 min



Pre-OAc-Rha-C6-NHS  
1H 400MHz DMSO-d6

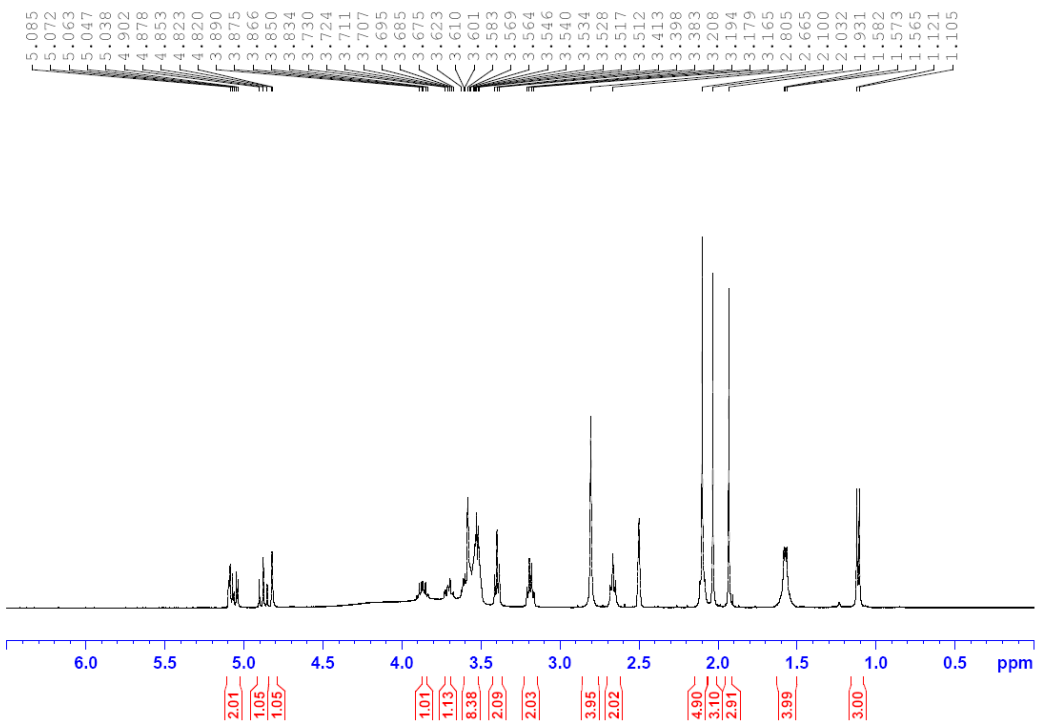

<sup>1</sup>H NMR spectrum (400 MHz, DMSO-*d*<sub>6</sub>): compound **10**

Per-OAc-Rha-C6-NHS  
13C 100MHz DMSO-d6

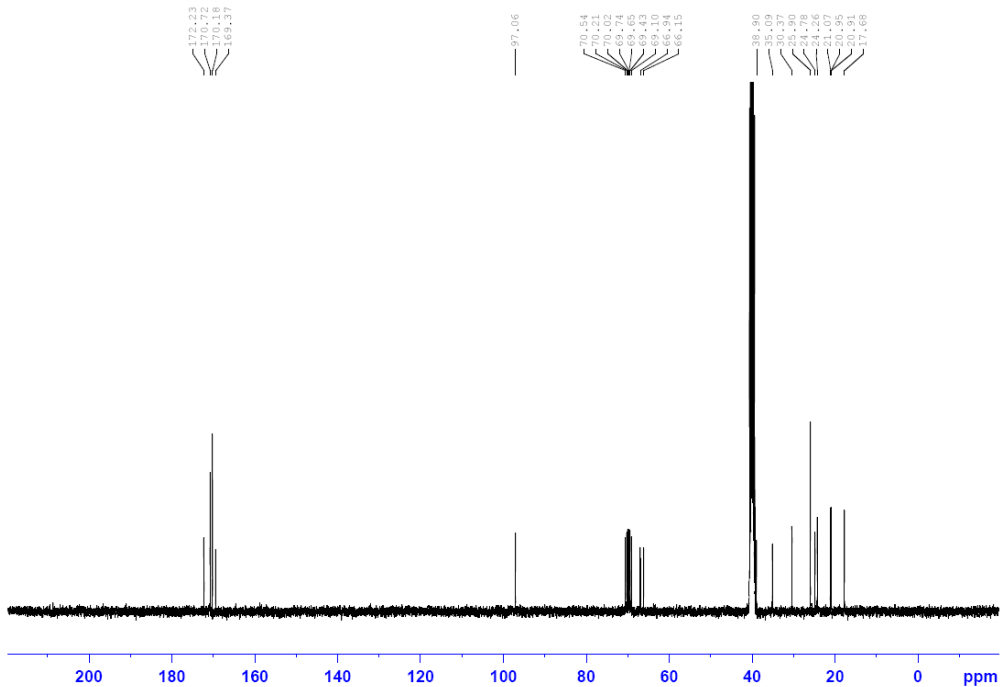

<sup>13</sup>C NMR spectrum (100 MHz, DMSO-*d*<sub>6</sub>): compound **10**

oc-a-Gal-PEG-C6-NHS  
1H 600MHz D2O

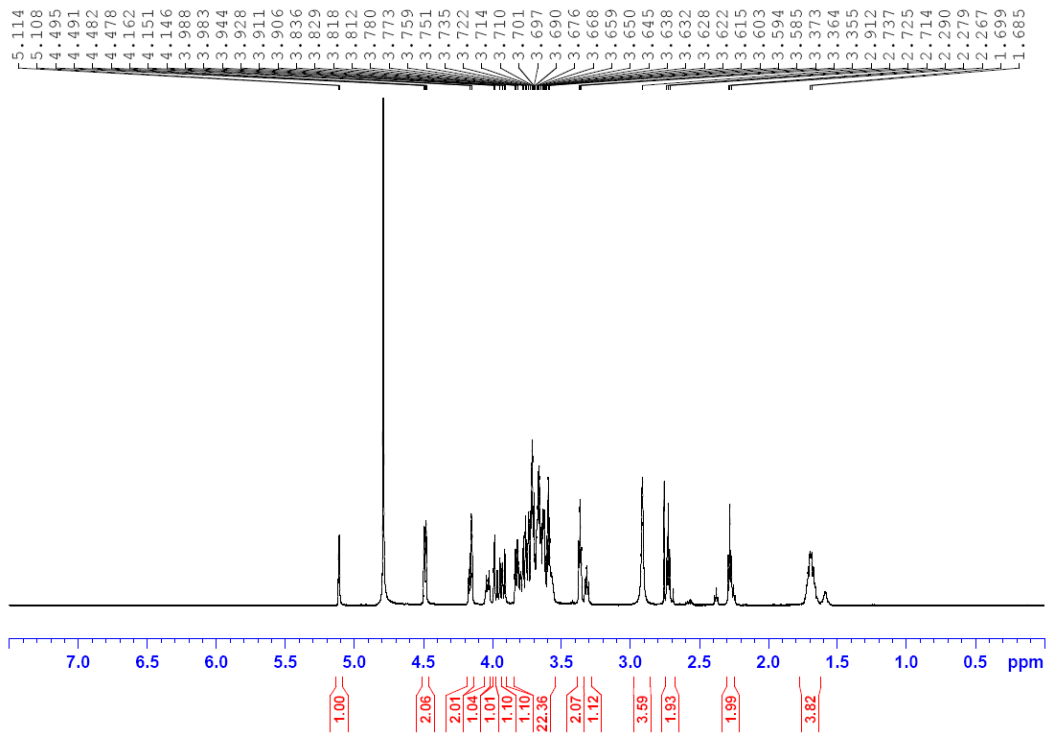

<sup>1</sup>H NMR spectrum (600 MHz, D<sub>2</sub>O): compound **16**

a-Gal-PEG-C6-NHS  
13C 150MHz D2O

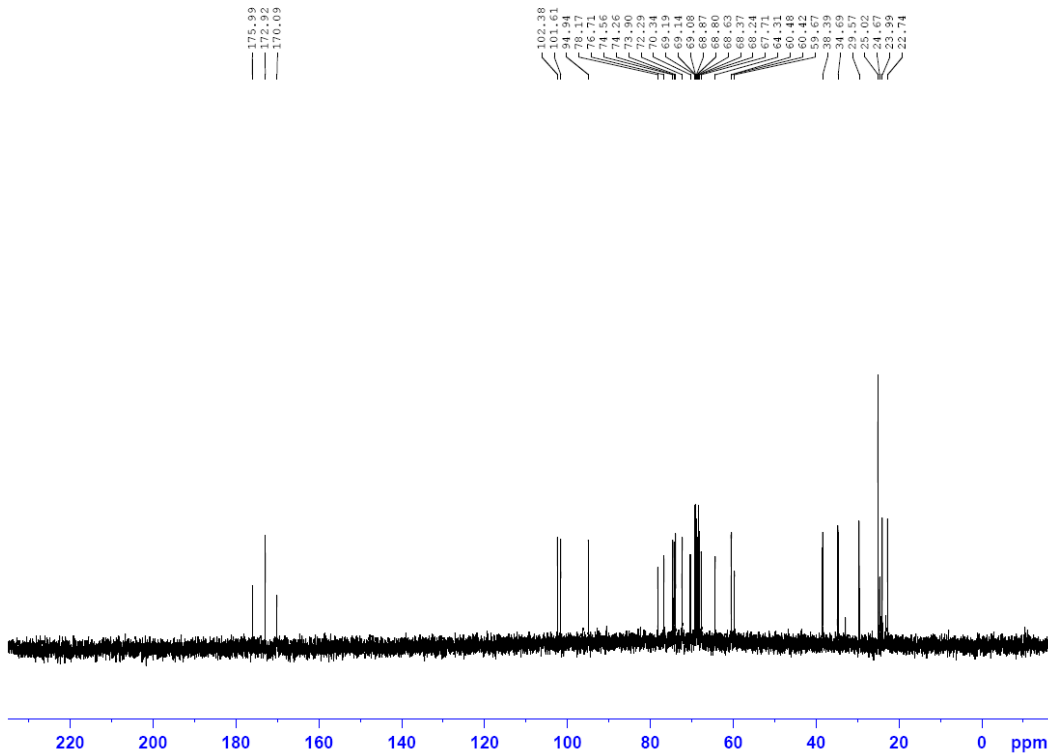

<sup>13</sup>C NMR spectrum (150 MHz, D<sub>2</sub>O): compound **16**

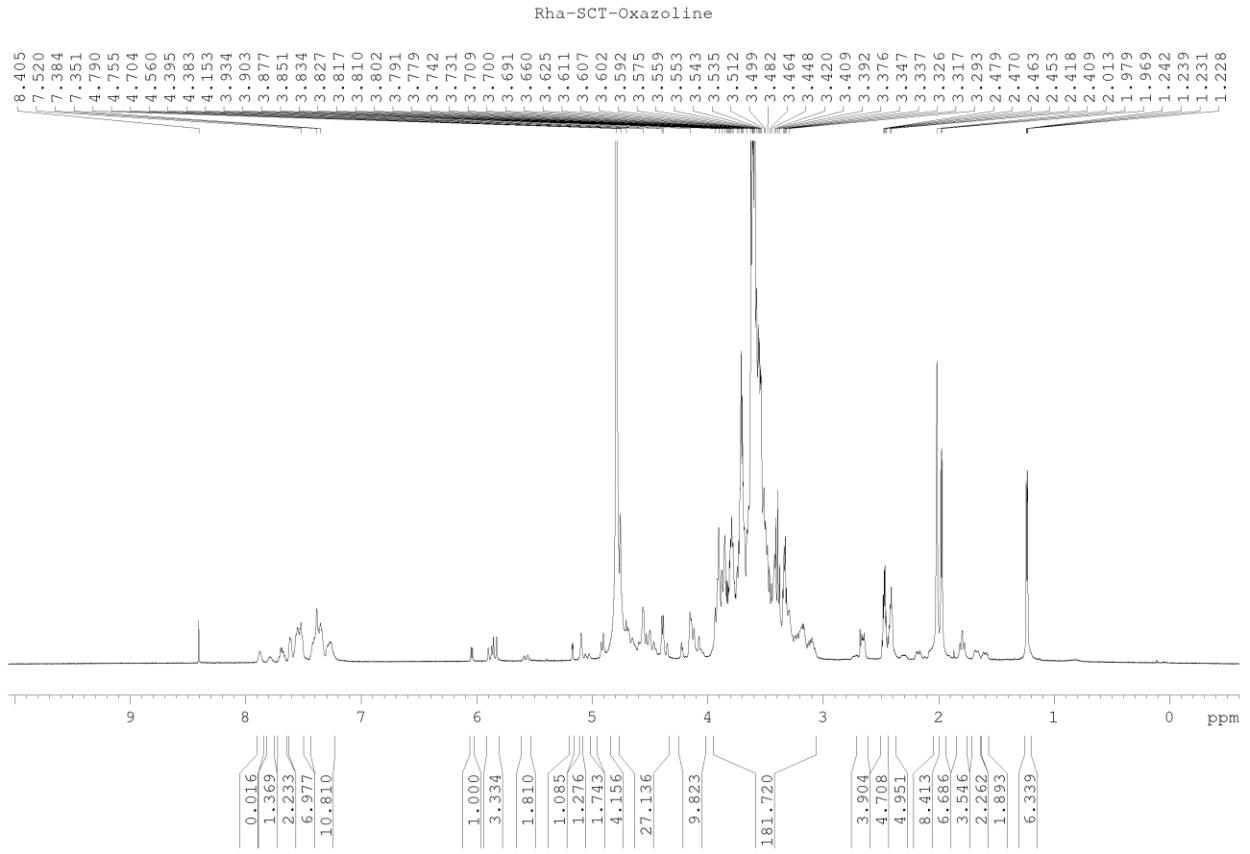

$^1\text{H}$  NMR spectrum (600 MHz,  $\text{D}_2\text{O}$ ): compound **26a**

Rha8-SCT-oxa  
1H 600MHz D2O

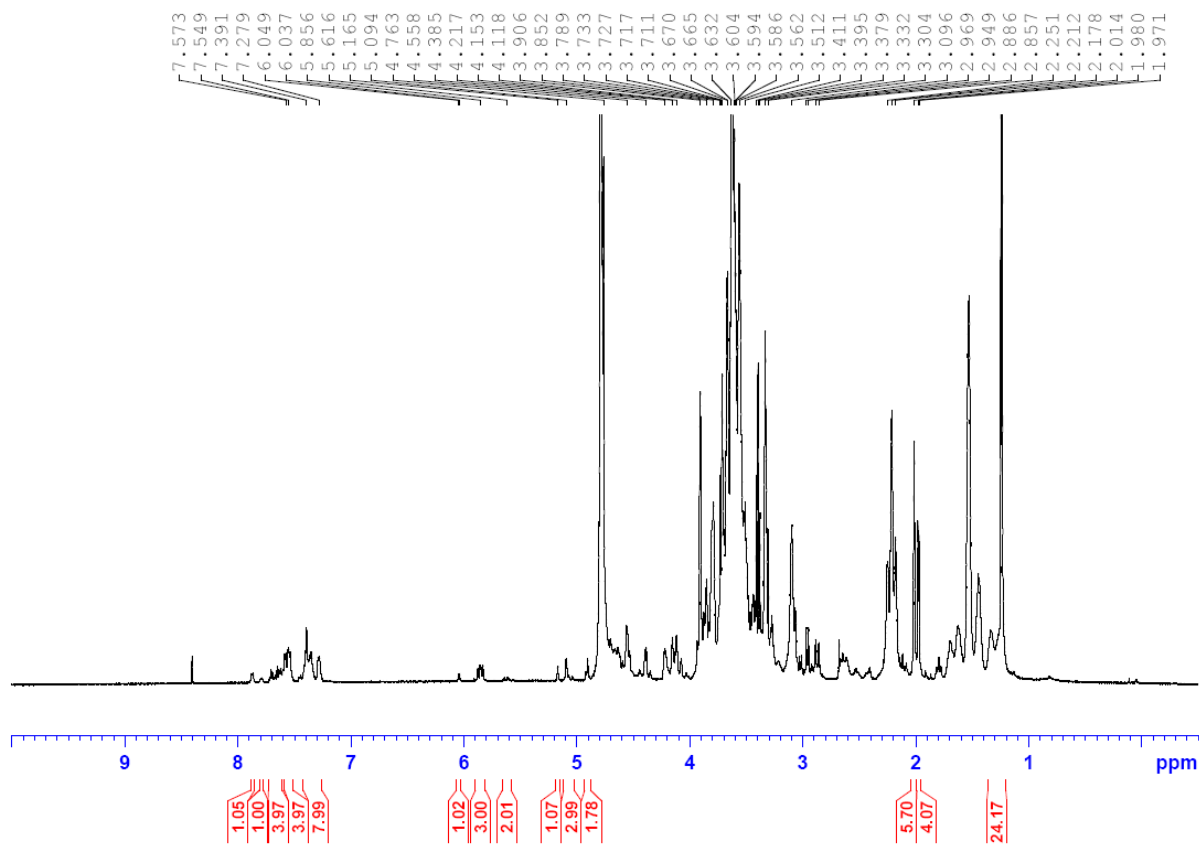

<sup>1</sup>H NMR spectrum (600 MHz, D<sub>2</sub>O): compound **26b**
